# Supplementary material
Source: HighWire-hosted journal article supplement (https://nutrition.bmj.com/content/6/1/76)
Supplement: inline-supplementary-material-1 [file inline-supplementary-material-1.pdf]

**Appendix.**

Dietary Risk Screener (DRS) in English and Chinese.

|                                                                                                                                         |                                      |
|-----------------------------------------------------------------------------------------------------------------------------------------|--------------------------------------|
| Dietary Risk Screener Questionnaire (DRS)                                                                                               | 膳食风险筛选问卷 ( DRSQ )                    |
| Name                                                                                                                                    | 名字 :                                 |
| For the following foods, please select the frequency that best describes how often you eat each food or group of foods in a normal week | 在以下的食物中, 请选择最接近您平常一个星期里会吃这种或这类食物的次数。 |
| Daily                                                                                                                                   | 每天                                   |
| 2-3 times per week                                                                                                                      | 每个星期2-3次                             |
| 1 time per week                                                                                                                         | 每个星期1次                               |
| Never                                                                                                                                   | 从不食用                                 |
| Fast food-type meals, sit down or take out meals, frozen dinners, including pizza                                                       | 快餐类食品, 坐下用餐或外卖餐, 冷冻晚餐, 包括披萨          |
| Bread, rolls, sandwiches                                                                                                                | 面包, 面包卷, 三明治                         |
| Chips, popcorn, pretzels, snack mixes, crackers                                                                                         | 薯片, 爆米花, 椒盐脆饼, 杂物零食, 饼干              |
| Sausage, cured or deli meats, hot dogs                                                                                                  | 香肠, 腌制或熟食肉, 热狗                       |
| Regular soda, sweetened iced tea, juice, flavored milk or flavored coffee drinks                                                        | 普通汽水, 含糖冰茶, 果汁, 调味牛奶或调味咖啡饮料          |
| Peanuts, tree nuts, seeds, peanut butter or other nut butter                                                                            | 花生, 坚果, 种子, 花生酱或其他坚果酱                |
| Fish or shellfish                                                                                                                       | 鱼或贝类海鲜                               |
| Vegetables (not including potatoes, peas, corn or beans)                                                                                | 蔬菜 ( 不包括土豆, 豌豆, 玉米或豆类 )              |
| Fruit (fresh, canned or dried; not including juice)                                                                                     | 水果 ( 新鲜, 罐头或干果; 不包括果汁 )              |
| “Thank you for completing the Dietary Risk Screener Questionnaire.”                                                                     | “感谢您填写膳食风险筛选问卷。”                     |
